# Supplementary material for: Electroactive polymer tag modified nanosensors for enhanced intracellular ATP detection
Source: Royal Society of Chemistry journal article supplement (doi:10.1039/d4an00511b), 2024-01-01
Supplement: d4an00511b1.pdf [file d4an00511b1.pdf]

## Electronic Supplementary Information

# Electroactive Polymer Tag Modified Nanosensors for Enhanced Intracellular ATP Detection

Yi-Ran Kang, Yu-Ting Jiao, Chen-Fei Zhao, Xin-Wei Zhang\* and Wei-Hua Huang\*

*College of Chemistry and Molecular Sciences, Wuhan University, Wuhan 430072, China.*

*E-mail: xinweizhang@whu.edu.cn, whhuang@whu.edu.cn.*

## Table of Contents

### 1. Experimental Section

1.1 Materials and Instruments

1.2 Cell Experiments

### 2. Supporting Figures

Fig S1: The preparation of Fc<sub>(n)</sub>-ATP aptamer via RAFT polymerization

Fig S2: Detailed preparation process of the single-ferrocene ATP-aptamer NWEs

Fig S3: Characterization of a SiC@C@Au NWE

Fig S4: Effect of incubation time on the SWV peak current for 1 mM ATP

Fig S5: Estimation of intracellular ATP level in responses to drug incubation at different times by ATP assay kit

Fig S6: The effect of Ca<sup>2+</sup> and oligomycin on cell viability was measured by MTT experiments

### 3. References



preparing all aqueous solutions during the whole experiments.

Scanning electron microscopy (SEM) images were performed on a scanning electron microscope (TESCAN CLARA) equipped with an energy-dispersive X-ray spectroscopy spectrometer (Ultim Extreme). X-ray photoelectron spectroscopy (XPS) measurements were implemented by a photoelectron spectrometer (ESCALAB250Xi, Thermo Fisher Scientific). The C 1s peak (284.6 eV) was used as a reference to calibrate binding energies and Al K $\alpha$  X-ray radiation was used as the X-ray source. A microforge (World Precision Instruments, 40 $\times$  objective) was used to fabricate NWEs. Electrochemical measurements were carried out with a CHI 660e electrochemical workstation (CHI Instruments) in a two-electrode system with an Ag/AgCl electrode as the reference/counter electrode. An inverted fluorescent microscope (AxioObserver Z1 and Axiovert 200M, Zeiss) was used for bright-field (BF) and fluorescence (FL) imaging. A micromanipulator (TransferMan 4r, Eppendorf) was used for single-cell detection at the nanoelectrodes.

## **1.2 Cell Experiments**

### **1.2.1. Cell culture**

The MCF-7 cells were cultured in DMEM added with 10% FBS and 1% penicillin-streptomycin at 37 °C under 5% CO<sub>2</sub> atmosphere. Before further experiments, the MCF-7 cells were seeded on small round slides (diameter of 7 mm) and cultured for 12 h. The conditions of cells incubation with different reagents were as follows: CaCl<sub>2</sub> (10 mM) for 2 h; oligomycin (3  $\mu$ g/mL) for 1 h.

### **1.2.2. Cell vitality experiments**

After a F<sub>C(n)</sub>-ATP aptamer NWE was inserted into several MCF-7 cells and then withdrawn, the vitality of penetrated cells was investigated by the fluorescence staining. MCF-7 cells were incubated with 1 mL fluorescence dye solution (Calcein-AM + PI) (3  $\mu$ g/mL) for 30 min and then washed with PBS 3 times to remove the residual dyes. BF and FL microphotographs were taken with an inverted fluorescent microscope.

### 1.2.3. Data acquisition and analysis of single-cell intracellular ATP assays

The  $\text{Fc}_{(n)}$ -ATP aptamer NWE was connected to a patch-clamp amplifier probe. Subsequently, the NWE was moved to the vicinity of the cell membrane under a micromanipulator (TransferMan® NK2, Eppendorf) with a 40-fold objective lens, and then the NWE was slowly moved forward to insert it into the cell. After incubation for 7 min, the signal of ferrocene polymers on the electrode surface was monitored by square-wave voltammetry (SWV) with an Ag/AgCl electrode as the reference/counter electrode, applying a voltage from -0.2 V to 0.4 V to the  $\text{Fc}_{(n)}$ -ATP aptamer NWE. To minimize noise interference, the above operations were carried out on a Faraday cage shield as well as an optical anti-shaking platform, and the relevant instruments were well grounded. The data were analyzed and processed by "Origin 2019" software.

## 2. Supporting Figures

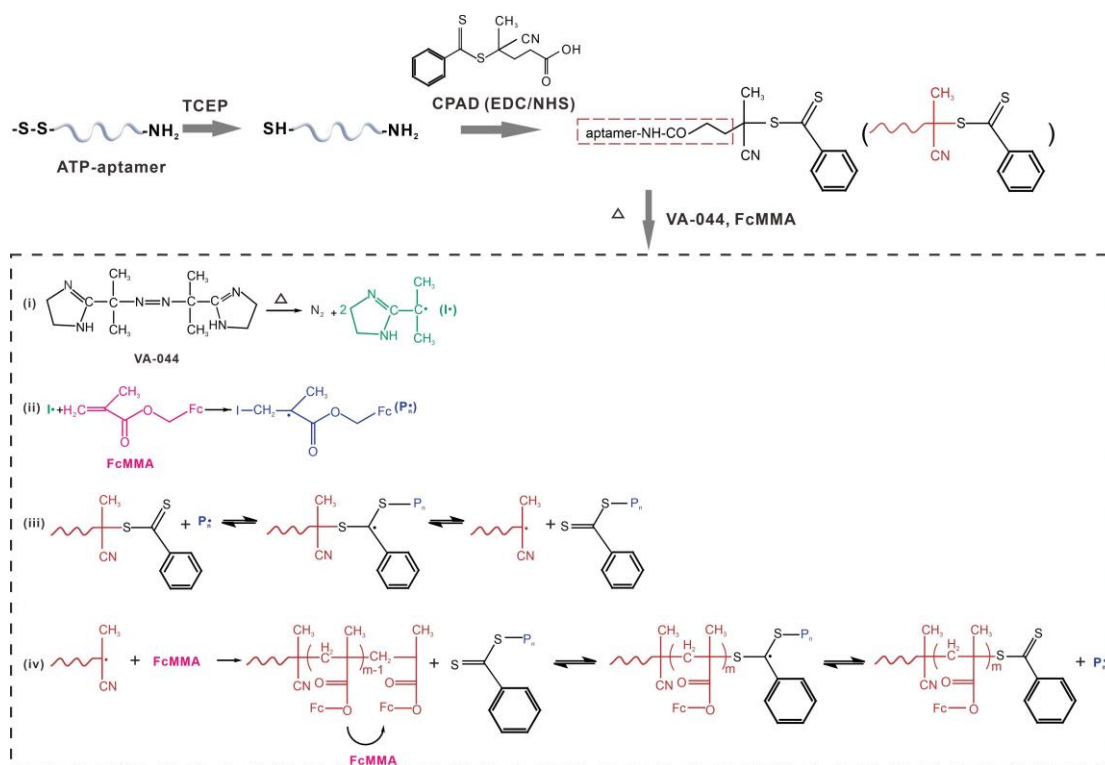

Fig S1. The preparation of Fc<sub>(n)</sub>-ATP aptamer via RAFT polymerization.

**Principle: (i):** By cleavage of two C-N bonds, the azo initiators (i.e., VA-044) thermally decompose to produce N<sub>2</sub> and alkyl radicals (I•); **(ii):** These alkyl radicals attack the methacrylic monomers (i.e., FcMMA) to form oligomeric radicals (P<sub>n</sub>•); **(iii):** The P<sub>n</sub>• radicals react with the CPAD connected to the aptamer to produce the radical intermediates, which can fragment either back into the CPAD and the P<sub>n</sub>• radicals or into the reinitiated free radicals containing aptamer chains and the thiocarbonylthio-group-capped dormant chains; **(iv):** By repeatedly reacting with the FcMMA monomers, each aptamer will carry a large number of electroactive Fc to improve electrochemical signal.<sup>1</sup>

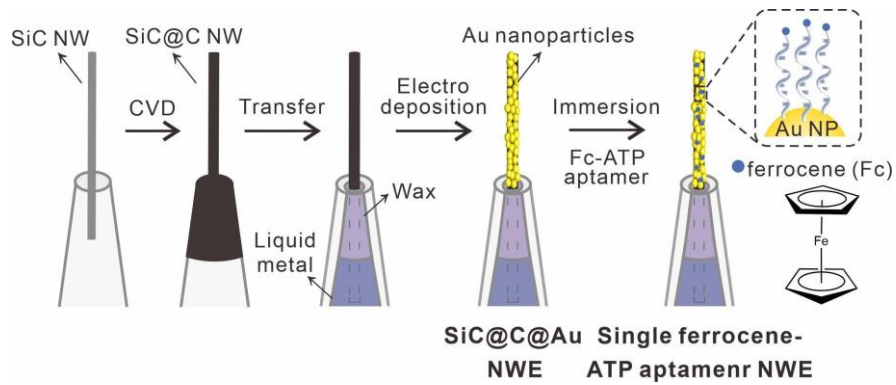

Fig S2. Preparation process of the single ferrocene-ATP aptamer NWEs.

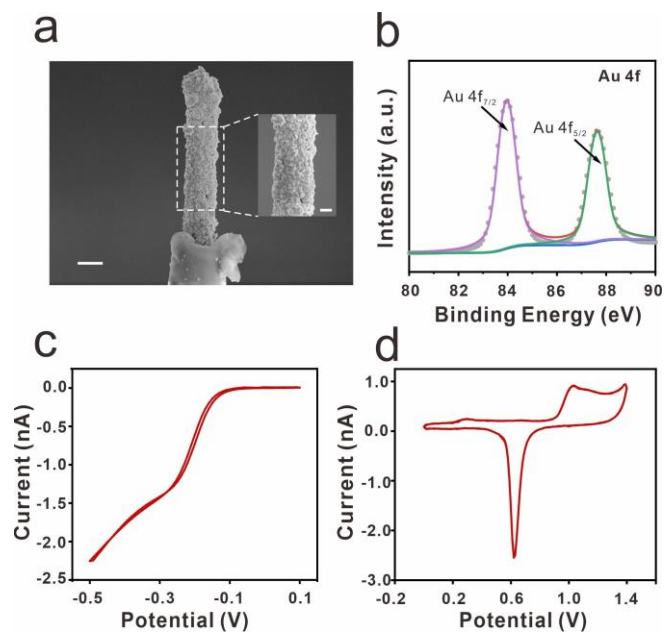

Fig S3. Characterization of a SiC@C@Au NWE. (a) SEM image of a SiC@C@Au NWE (scale bar: 1  $\mu\text{m}$ ). Inset: a magnified SEM image of its detail (scale bar: 400 nm). (b) XPS data of Au 4f states from SiC@C@Au NWs. (c) Cyclic voltammogram of  $\text{Ru}(\text{NH}_3)_6^{3+}$  (1 mM) at a SiC@C@Au NWE. (d) Cyclic voltammogram of an Au NWE in 0.05 M  $\text{H}_2\text{SO}_4$ .

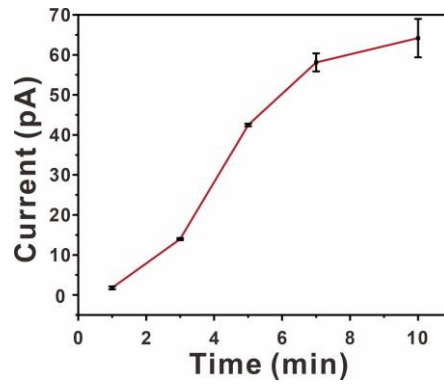

Fig S4. Effect of incubation time on the SWV peak current for 1 mM ATP.

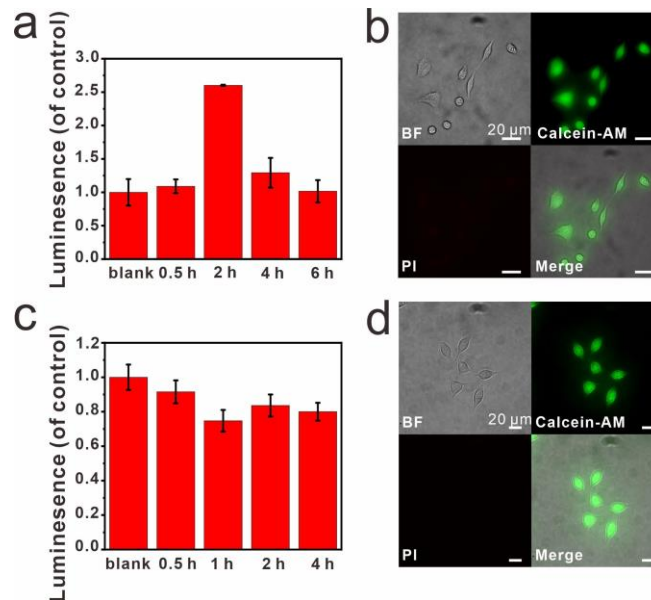

Fig S5. Estimation of intracellular ATP level in responses to drug incubation at different times by ATP assay kit. (a) Statistical results of the luminescence intensity from cells at different  $\text{Ca}^{2+}$  incubation times. (b) BF and FL imaging of MCF-7 cells stained with Calcein-AM (green) and PI (red) after incubation with  $\text{CaCl}_2$  (10 mM) for 2 h. (c) Statistical results of the luminescence intensity from cells at different oligomycin incubation times. (d) BF and FL imaging of MCF-7 cells stained with Calcein-AM (green) and PI (red) after incubation with oligomycin (3  $\mu\text{g}/\text{mL}$ ) for 1 h.

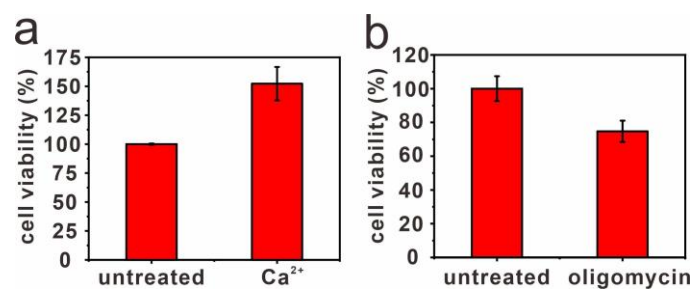

Fig S6. The effect of (a)  $\text{Ca}^{2+}$  and (b) oligomycin on cell viability was measured by MTT experiment (n=4).

### 3. References

1. Q. Hu, D. Han, S. Gan, Y. Bao and L. Niu, *Anal. Chem.*, 2018, **90**, 12207-12213.
